# Supplementary material for: Antimicrobial and Antibiofilm Photodynamic Action of Photosensitizing Nanoassemblies Based on Sulfobutylether-β-Cyclodextrin
Source: MDPI journal article supplement (doi:10.3390/molecules28062493), 2023-03-08
Supplement: s1 [file s1]

Supplementary Information

# Antimicrobial and Antibiofilm Photodynamic Action of Photosensitizing Nanoassemblies Based on Sulfobutylether- $\beta$ -Cyclodextrrin

Domenico Franco <sup>1,†</sup>, Roberto Zagami <sup>1,2,†</sup>, Laura Maria De Plano <sup>1,\*</sup>, Nina Burduja <sup>1,2</sup>, Salvatore Pietro Paolo Guglielmino <sup>1</sup>, Luigi Monsù Scolaro <sup>1</sup> and Antonino Mazzaglia <sup>2,\*</sup>

<sup>1</sup> Department of Chemical, Biological, Pharmaceutical and Environmental Sciences, University of Messina, V.le F. Stagno d'Alcontres 31, 98166 Messina, Italy; dfranco@unime.it (D.F.); roberto.zagami@unime.it (R.Z.); nina.burduja@studenti.unime.it (N.B.); sguglielm@unime.it (S.P.P.G.); luigi.monsuscolaro@unime.it (L.M.S.)

<sup>2</sup> National Council of Research, Institute for the Study of Nanostructured Materials (CNR-ISMN), URT of Messina c/o Department of Chemical, Biological, Pharmaceutical and Environmental Sciences of the University of Messina, V.le F. Stagno d'Alcontres 31, 98166 Messina, Italy

\* Correspondence: ldeplano@unime.it (L.M.D.P.); antonino.mazzaglia@cnr.it (A.M.)

† These authors contributed equally to this work.

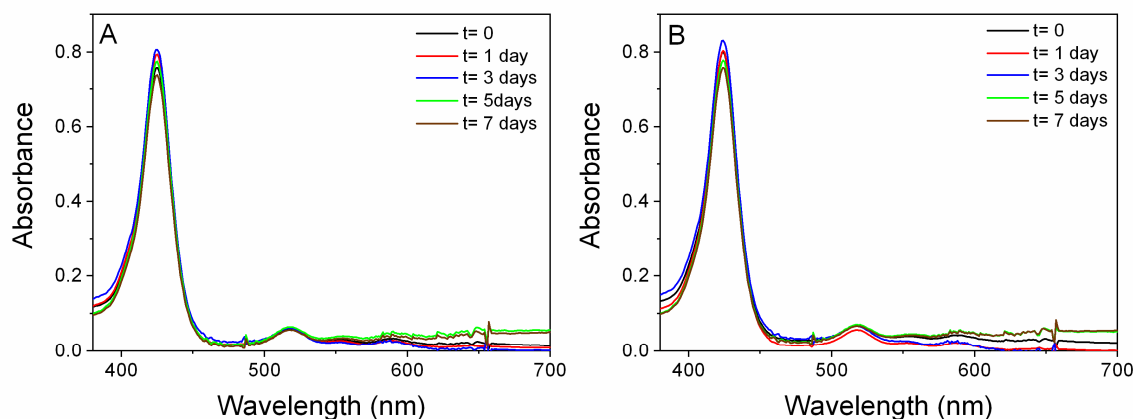

**Figure S1.** Stability studies by UV/Vis of (CAPTISOL®/TMPyP)<sub>50\_1</sub> in ultrapure water (A) and 0.9 wt % NaCl aqueous solution (B) at T= 37 °C. [TMPyP] = 3  $\mu$ M, path length 1 cm.

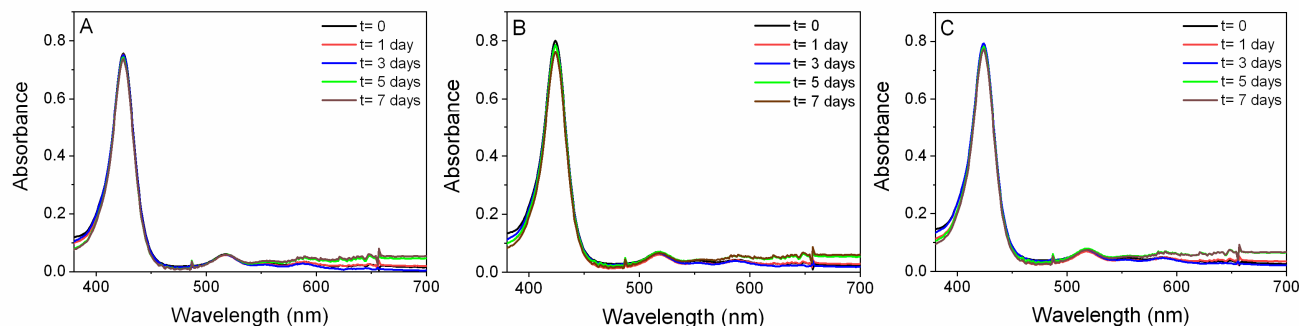

**Figure S2.** Stability studies by UV/Vis of (CAPTISOL®/TMPyP)<sub>50\_1</sub> in ultrapure water (A), 0.9 wt % NaCl aqueous solution (B) and PBS 10 mM, pH 7.4 (C) at T= 4 °C. [TMPyP] = 3  $\mu$ M, path length 1 cm.
